# Supplementary material for: Coronavirus Disease-19 Outbreaks In Iraq: A Case Report
Source: Research Square preprint supplement (doi:10.21203/rs.3.rs-279470/v1), 2021-02-26
Supplement: Supplementary file 1 [file 01650f84844380ec4b28c972.xlsx]

## Sheet: ورقة1
			Infection and Death per day and Region in Iraq
		Daily	All Iraq States as zones				Infected cases		Deaths		Daily recoveries
		MM/DD/ 2020	Northern	Southern and Eastern	Western	Central Baghdad	New	Total	New	Total
		2020-02-21	0	0	0	0	0	0	0	0	0
		2020-02-22	0	1	0	0	1	1	0	0	0
		2020-02-23	0	0	0	0	0	1	0	0	0
		2020-02-24	0	0	0	0	0	1	0	0	0
		2020-02-25	4	0	0	0	4	5	0	0	0
		2020-02-26	0	0	0	0	0	5	0	0	0
		2020-02-27	1	0	0	1	2	7	0	0	0
		2020-02-28	0	0	0	1	1	8	0	0	0
		2020-02-29	0	1	0	4	5	13	0	0	0
		2020-03-01	4	0	0	2	6	19	0	0	0
		2020-03-02	1	2	0	3	6	24	0	0	0
		2020-03-03	0	4	0	1	5	29	0	0	0
		2020-03-04	0	3	0	0	3	32	3	3	0
		2020-03-05	4	1	0	0	5	37	0	3	0
		2020-03-06	3	1	0	5	9	46	1	4	1
		2020-03-07	1	1	0	7	9	55	0	4	0
		2020-03-08	3	5	0	1	9	64	2	6	0
		2020-03-09	3	3	0	0	6	70	1	7	3
		2020-03-10	6	1	0	11	18	88	0	7	0
		2020-03-11	0	2	0	0	2	90	1	8	12
		2020-03-12	0	1	0	5	6	96	0	8	11
		2020-03-13	0	5	0	5	10	106	1	9	0
		2020-03-14	0	2	0	3	5	111	0	9	2
		2020-03-15	0	5	0	9	14	125	0	9	0
		2020-03-16	0	3	0	3	6	131	1	10	6
		2020-03-17	0	4	0	17	21	152	1	11	9
		2020-03-18	0	1	0	5	6	158	1	12	2
		2020-03-19	1	18	0	8	27	185	2	14	6
		2020-03-20	1	8	0	6	15	200	3	17	0
		2020-03-21	7	0	0	0	7	207	0	17	0
		2020-03-22	7	4	0	8	19	226	4	21	8
		2020-03-23	23	3	0	7	33	259	3	24	5
		2020-03-24	19	28	0	3	50	309	4	28	0
		2020-03-25	9	12	0	9	30	339	2	30	27
		2020-03-26	2	24	0	10	36	375	7	37	16
		2020-03-27	4	57	1	14	76	451	4	41	17
		2020-03-28	12	28	0	9	49	500	2	43	9
		2020-03-29	9	24	0	8	41	541	0	43	12
		2020-03-30	26	43	0	14	83	624	4	47	9
		2020-03-31	13	41	0	12	66	690	4	51	18
		2020-04-01	14	20	0	0	34	724	2	53	12
		2020-04-02	19	23	0	2	44	768	2	55	20
		2020-04-03	15	27	1	5	48	816	0	55	24
		2020-04-04	10	45	0	3	58	874	2	57	33
		2020-04-05	23	33	0	27	83	957	5	62	20
		2020-04-06	44	22	0	4	70	1027	3	65	65
		2020-04-07	11	59	0	27	97	1124	3	68	29
		2020-04-08	22	43	0	15	80	1204	4	72	78
		2020-04-09	3	15	0	12	30	1234	0	72	44
		2020-04-10	13	22	1	11	47	1281	1	73	54
		2020-04-11	6	21	0	12	39	1320	2	75	51
		2020-04-12	5	15	0	14	34	1354	4	79	39
		2020-04-13	0	19	0	7	26	1380	2	81	67
		2020-04-14	3	14	0	5	22	1402	0	81	49
		2020-04-15	1	10	0	4	15	1417	1	82	46
		2020-04-16	4	8	0	7	19	1436	1	83	44
		2020-04-17	2	32	0	14	48	1484	1	84	50
		2020-04-18	0	24	0	7	31	1515	1	85	47
		2020-04-19	0	21	0	5	26	1541	0	85	56
		2020-04-20	0	22	0	13	35	1576	0	85	34
		2020-04-21	0	13	0	15	28	1604	1	86	53
		2020-04-22	0	17	0	12	29	1633	0	86	49
		2020-04-23	0	28	1	17	46	1679	0	86	25
		2020-04-24	4	14	1	12	31	1710	3	89	33
		2020-04-25	5	17	0	32	54	1764	0	89	20
		2020-04-26	0	27	1	29	57	1821	1	90	39
		2020-04-27	10	9	0	8	27	1848	1	91	23
		2020-04-28	13	47	0	20	80	1928	2	93	33
		2020-04-29	0	55	0	20	75	2003	2	95	27
		2020-04-30	21	44	0	17	82	2085	1	96	29
	Totle cases in Iraq		411	1101	6	567	2085		96		1375

## Sheet: ورقة2
		TABLE 1. The number of cases of COVID–19 outbreak according to WHO situation report
			Region	Totle Confirmed Cases			Recoverd	Death	Population
			Baghdad		567		332	40	8.318.696
			Najaf		303		271	6	1.500.522
			Basra		431		187	17	2.972.162
			Erbil		198		162	1	1.896.753
			Sulaymaniyah		161		141	4	2.212.099
			Karbala		86		80	6	1.241.273
			Dhi Qar		65		50	3	2.132.149
			Al Muthanna		82		33	3	824.831
			Wasit		35		28	2	1.401.442
			Kirkuk		40		26	2	1.629.625
			Diyala		14		15	4	1.660.007
			Babylon		45		9	5	2.093.416
			Duhok		18		15	0	1.318.458
			Al-Qadisiyyah		12		10	1	1.311.699
			Maysan		14		7	2	1.134.968
			Nineveh		6		6	0	3.793.982
			Salahaddin		4		1	0	1.615.924
			Al Anbar		2		2	0	1.796.557
			Total Cases in Iraq		2085		1375	96	38.854.563

## Sheet: ورقة3
Baghdad		567
Najaf		303
Basra		431
Erbil		198
Sulaymaniyah		161
Karbala		86
Dhi Qar		65
Al Muthanna		82
Wasit		35
Kirkuk		40
Diyala		14
Babylon		45
Duhok		18
Al-Qadisiyyah		12
Maysan		14
Nineveh		6
Salahaddin		4
Al Anbar		2

## Sheet: ورقة4
				DATE	Cases
				2020-02-21	0
				2020-02-22	1
				2020-02-23	1
				2020-02-24	1
				2020-02-25	5
				2020-02-26	5
				2020-02-27	7
				2020-02-28	8
				2020-02-29	13
				2020-03-01	19
				2020-03-02	24
				2020-03-03	29
				2020-03-04	32
				2020-03-05	37
				2020-03-06	46
				2020-03-07	55
				2020-03-08	64
				2020-03-09	70
				2020-03-10	88
				2020-03-11	90
				2020-03-12	96
				2020-03-13	106
				2020-03-14	111
				2020-03-15	125
				2020-03-16	131
				2020-03-17	152
				2020-03-18	158
				2020-03-19	185
				2020-03-20	200
				2020-03-21	207
				2020-03-22	226
				2020-03-23	259
				2020-03-24	309
				2020-03-25	339
				2020-03-26	375
				2020-03-27	451
				2020-03-28	500
				2020-03-29	541
				2020-03-30	624
				2020-03-31	690
				2020-04-01	724
				2020-04-02	768
				2020-04-03	816
				2020-04-04	874
				2020-04-05	957
				2020-04-06	1027
				2020-04-07	1124
				2020-04-08	1204
				2020-04-09	1234
				2020-04-10	1281
				2020-04-11	1320
				2020-04-12	1354
				2020-04-13	1380
				2020-04-14	1402
				2020-04-15	1417
				2020-04-16	1436
				2020-04-17	1484
				2020-04-18	1515
				2020-04-19	1541
				2020-04-20	1576
				2020-04-21	1604
				2020-04-22	1633
				2020-04-23	1679
				2020-04-24	1710
				2020-04-25	1764
				2020-04-26	1821
				2020-04-27	1848
				2020-04-28	1928
				2020-04-29	2003
				2020-04-30	2085
